# Supplementary material for: Modifying a partial corn-sql layer-based (3,3,3,3,4,4)-c topological MOF by substitution of OH− with Cl− and its highly selective adsorption of C2 hydrocarbons over CH4
Source: Royal Society of Chemistry journal article supplement (doi:10.1039/d0dt04142d), 2021-01-01
Supplement: d0dt04142d1.pdf [file d0dt04142d1.pdf]

## Supplementary Information

### Modifying a Partial Corn-*sql* Layer-based (3,3,3,3,4,4)-c Topological MOF by Substitution of OH<sup>-</sup> with Cl<sup>-</sup> and its Highly Selective Adsorption of C<sub>2</sub> Hydrocarbons over CH<sub>4</sub>

Hongtao Cheng<sup>a</sup>, Qian Wang<sup>\*a</sup>, Min Ding<sup>a</sup>, Yajun Gao<sup>b</sup>, Dongxu Xue<sup>a</sup> and Junfeng Bai<sup>\*a</sup>

<sup>a</sup> Key Laboratory of Applied Surface and Colloid Chemistry, Ministry of Education, School of Chemistry & Chemical Engineering, Shaanxi Normal University, Xi'an 710062, PR China

<sup>b</sup> State Key Laboratory of Coordination Chemistry, School of Chemistry & Chemical Engineering, Nanjing University, Nanjing 210093, PR China.

**General procedures.** All reagents were obtained from commercial vendors and, unless otherwise noted, were used without further purification. Elemental analysis (C, H, N) were carried out with an Elementar Vario EL III. The IR spectra were obtained in the 4000~400 cm<sup>-1</sup> on a Bruker Tensor27 spectrometer using KBr pellets. Thermal gravimetric analyses (TGA) were performed under N<sub>2</sub> atmosphere (100 ml/min) with a heating rate of 5 °C/min using a Beijing Henven HTG-1 thermogravimetric analyzer. Powder X-ray diffraction (PXRD) data were collected on a Bruker D8 ADVANCE X-ray diffractometer with Cu K $\alpha$  radiation. The content of Cu and Li in MOF sample was carried out with Optima 5300 DV ICP.

**X-ray crystallography.** Single-crystal X-ray diffraction data were measured on a Bruker D8 Venture at 153 K using graphite monochromated Cu/K $\alpha$  radiation ( $\lambda = 1.54178 \text{ \AA}$ ). Data reduction was made with the Bruker SAINT program. The structures were solved by direct methods and refined with full-matrix least squares technique using the SHELXTL package<sup>[1]</sup>. Non-hydrogen atoms were refined with anisotropic displacement parameters during the final cycles. Organic hydrogen atoms were placed in calculated positions with isotropic displacement parameters set to  $1.2 \times U_{eq}$  of the attached atom. The unit cell includes a large region of disordered solvent molecules, which could not be modelled as discrete atomic sites. We employed PLATON/SQUEEZE<sup>[2]</sup> to calculate the diffraction contribution of the solvent molecules and, thereby, to produce a set of solvent-free diffraction intensities; structures were then refined

again using the data generated. A summary of the crystallographic data are given in Table S1. CCDC 1878404 contains the supplementary crystallographic data for SNNU-Bai67.

**Table S1.** Crystallographic Data of SNNU-Bai67

| MOFs                                                        | SNNU-Bai67                                                                                                                 |
|-------------------------------------------------------------|----------------------------------------------------------------------------------------------------------------------------|
| Empirical formula                                           | C <sub>47</sub> H <sub>43</sub> Cl <sub>2</sub> Cu <sub>6</sub> N <sub>9</sub> O <sub>25</sub> [+4DMF·6(H <sub>2</sub> O)] |
| Formula weight                                              | 1585.04                                                                                                                    |
| T [K]                                                       | 153(2)                                                                                                                     |
| Wavelength [Å]                                              | 1.54178                                                                                                                    |
| Crystal system                                              | Monoclinic                                                                                                                 |
| Space group                                                 | <i>P2<sub>1</sub></i>                                                                                                      |
| a [Å]                                                       | 14.9785(6)                                                                                                                 |
| b [Å]                                                       | 18.7174(8)                                                                                                                 |
| c [Å]                                                       | 15.2305(6)                                                                                                                 |
| α [deg]                                                     | 90                                                                                                                         |
| β [deg]                                                     | 102.450(2)                                                                                                                 |
| γ [deg]                                                     | 90                                                                                                                         |
| V [Å <sup>3</sup> ]                                         | 4169.6(3)                                                                                                                  |
| Z                                                           | 2                                                                                                                          |
| ρ <sub>calc</sub> [g cm <sup>-3</sup> ]                     | 1.263                                                                                                                      |
| μ [mm <sup>-1</sup> ]                                       | 2.816                                                                                                                      |
| F(000)                                                      | 1592                                                                                                                       |
| Crystal size [mm <sup>3</sup> ]                             | 0.13 × 0.1 × 0.08                                                                                                          |
| Theta range [deg]                                           | 3.835 – 72.419                                                                                                             |
| Limiting indices                                            | -18 ≤ h ≤ 13<br>-23 ≤ k ≤ 22<br>-18 ≤ l ≤ 18                                                                               |
| Reflections collected                                       | 32433                                                                                                                      |
| Reflections unique                                          | 14901 [R(int) = 0.0476]                                                                                                    |
| Completeness                                                | 98.9 %                                                                                                                     |
| Data/restraints/parameters                                  | 14901 / 22 / 803                                                                                                           |
| Goodness-of-fit on F <sup>2</sup>                           | 1.027                                                                                                                      |
| R1, wR2 <sup>a</sup> [I>2σ(I)]                              | 0.0409, 0.1186                                                                                                             |
| R1, wR2 <sup>a</sup> [all data]                             | 0.0416, 0.1198                                                                                                             |
| Δρ <sub>max</sub> / Δρ <sub>min</sub> [e. Å <sup>-3</sup> ] | -0.642 / 0.911                                                                                                             |

<sup>a</sup> R1 = Σ||F<sub>o</sub>| - |F<sub>c</sub>||/|F<sub>o</sub>|; wR2 = [Σw(ΣF<sub>o</sub><sup>2</sup> - F<sub>c</sub><sup>2</sup>)<sup>2</sup>/Σw(F<sub>o</sub><sup>2</sup>)]<sup>1/2</sup>.

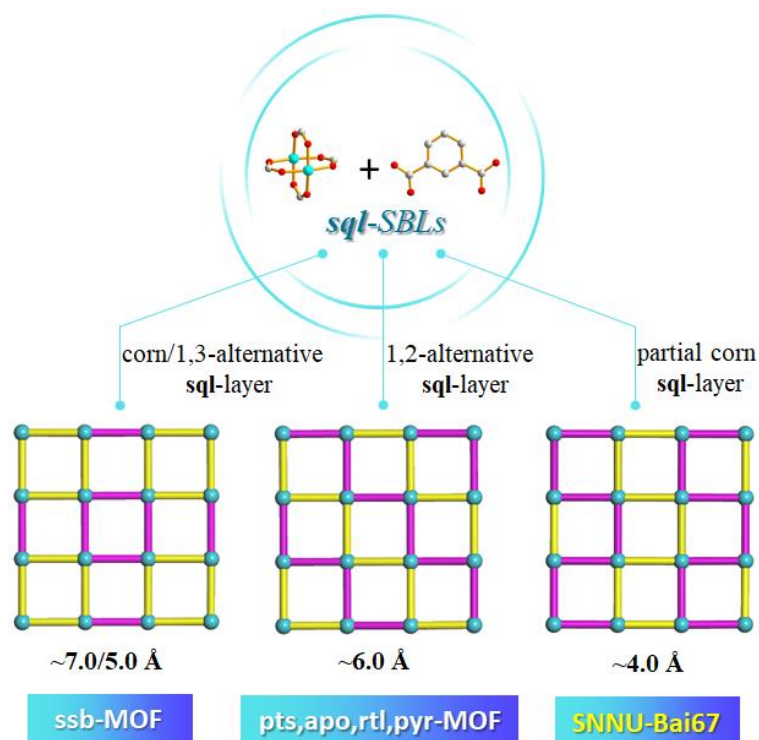

**Figure S1.** The illustrative graphics of three different kinds of *sql*-layers constructed by Cu-paddlewheel unit and isophthalate fragment exhibiting different pore sizes with the purple bond representing the 5-carbon atom in the isophthalate pointing “up” and the orange bond representing the 5-carbon atom in the isophthalate pointing “down”, and the corresponding MOFs resulted from each *sql*-layer.

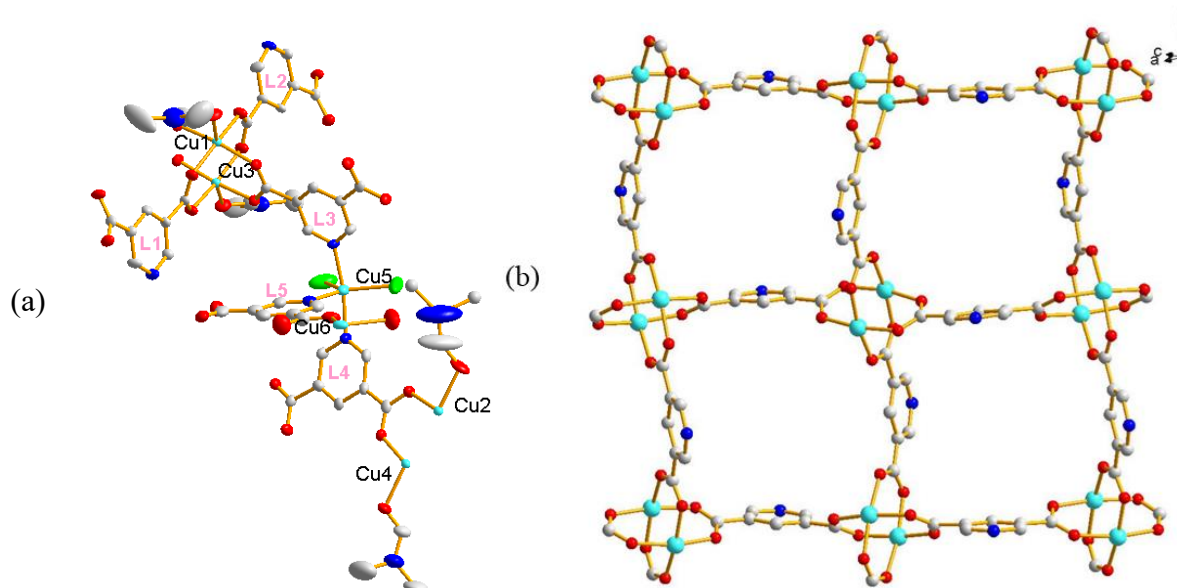

**Figure S2.** The asymmetric unit in the ellipsoid mode (a) and the partial corn-*sql* layer of SNNU-Bai67 (b). H atoms have been omitted for clarity.

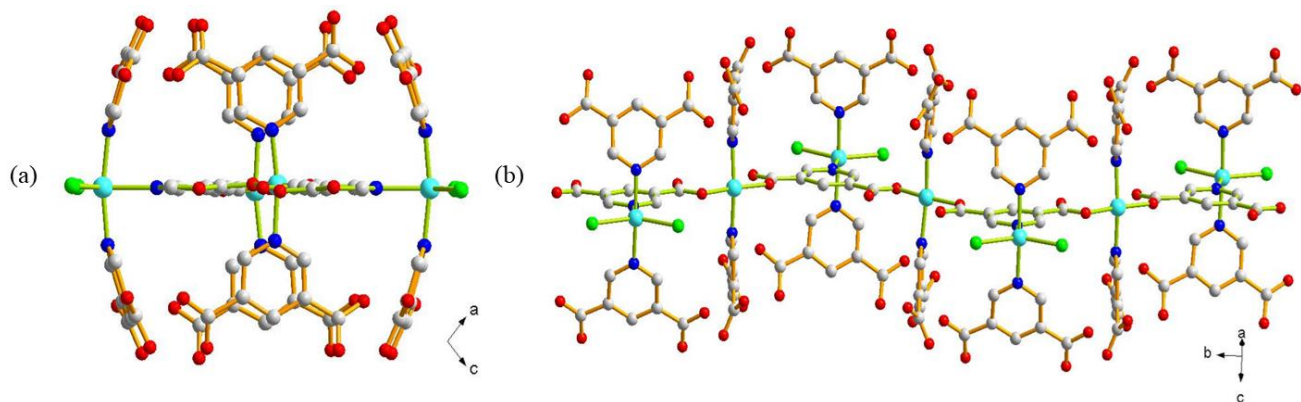

**Figure S3.** The chain of pillar viewed along (a) **b** axis and (b) (**a+c**) axis in SNNU-Bai67.

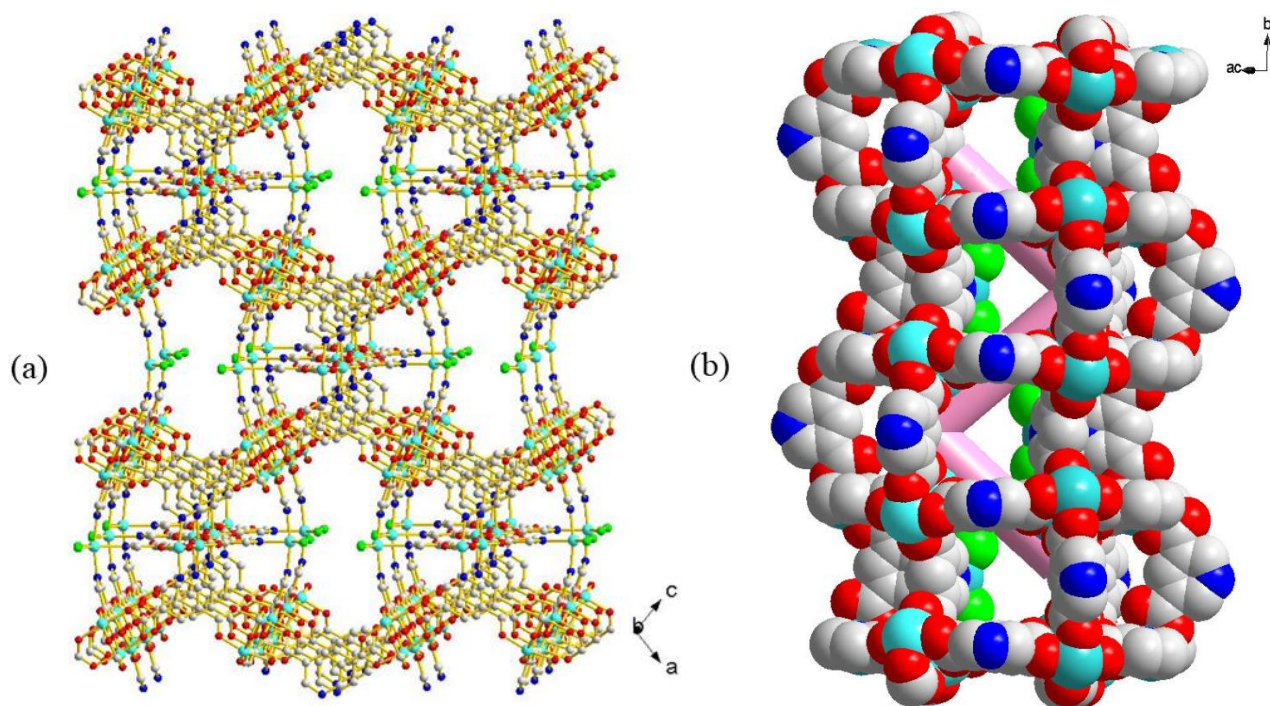

**Figure S4.** (a) The 3D structure viewed along **b** axis in SNNU-Bai67; (b) the 1D channel in SNNU-Bai67.

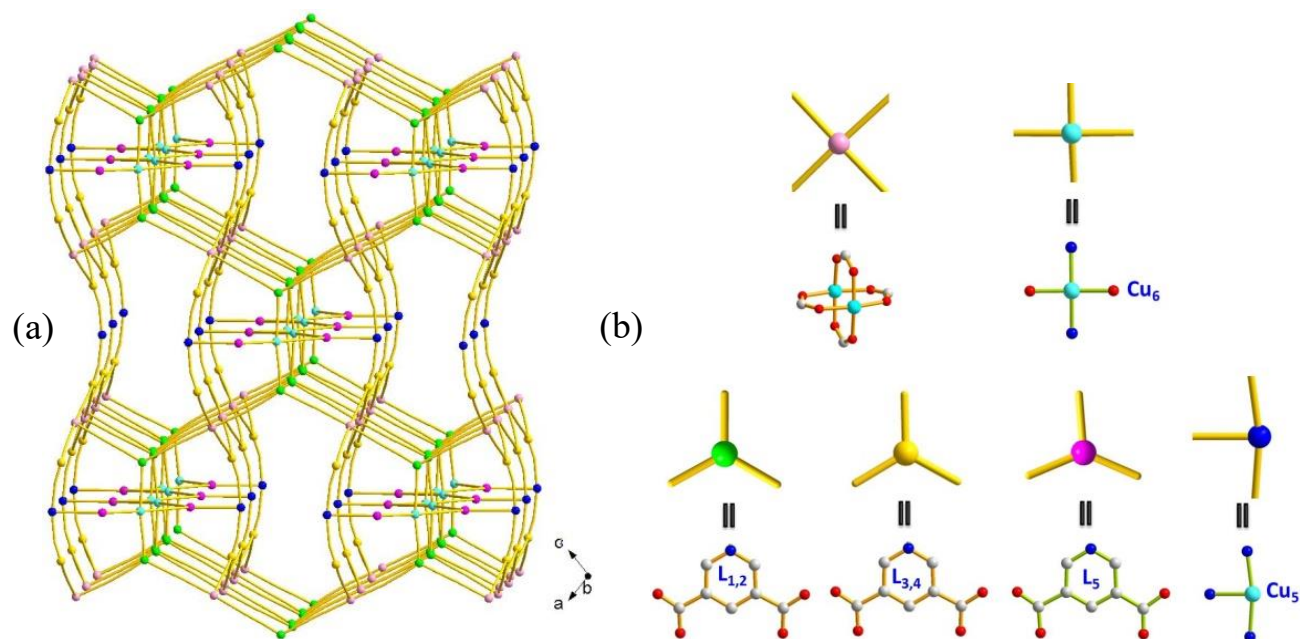

**Figure S5.** The 3D topological net with point symbol of  $\{6^2.8^2.10.12\}_2\{6^2.8\}_6\{6^4.8.10\}$  viewed along **b** axis (a) and two kinds of 4-connected nodes and four different 3-connected nodes (b) in SNNU-Bai67.

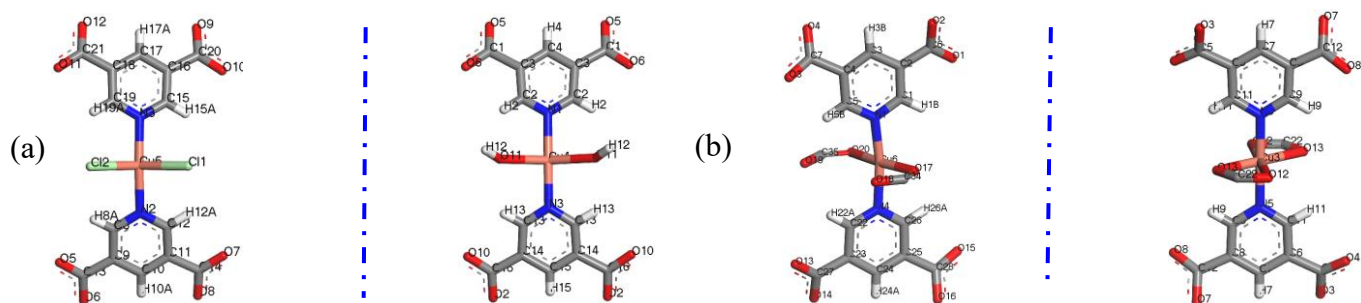

**Figure S6.** Comparisons of the coordination environments for two kinds of mononuclear  $\text{Cu}^{2+}$  ions in SNNU-Bai67 and VNU-18.

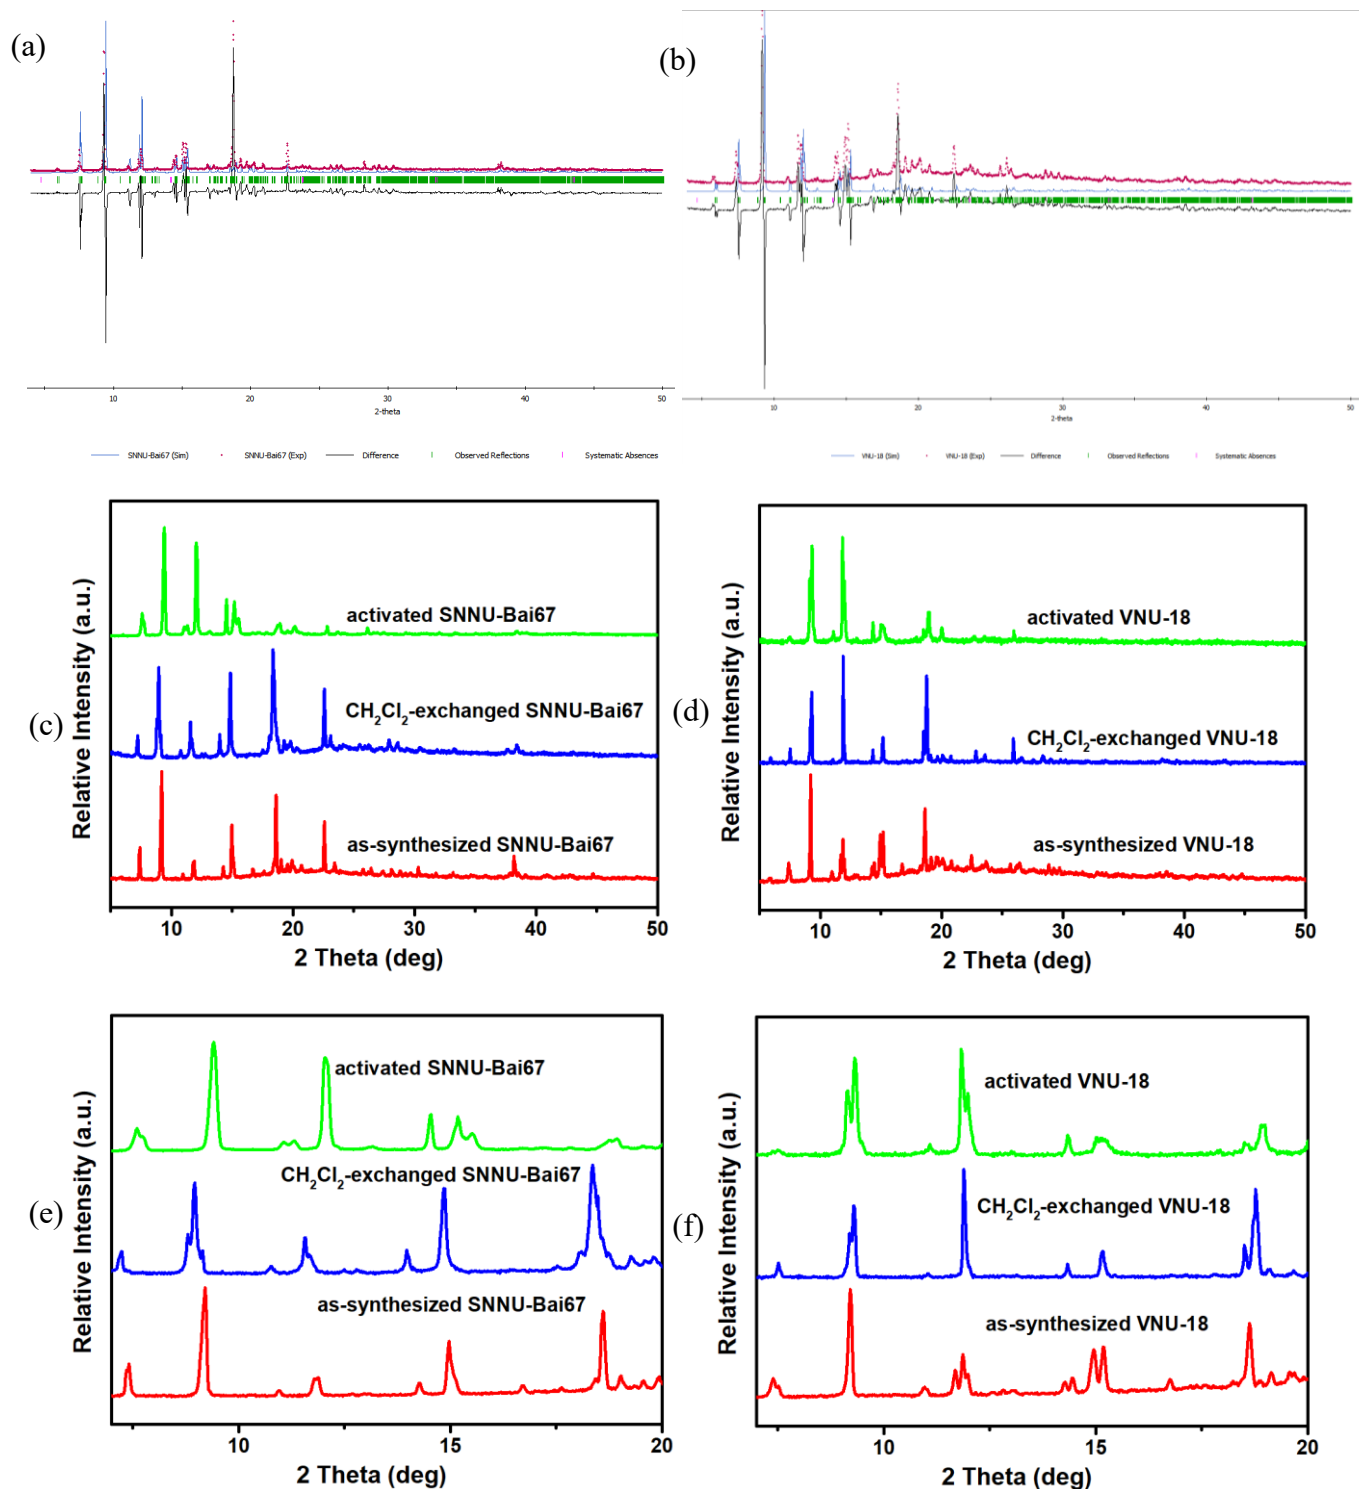

**Figure S7.** The simulated and experimental PXRD patterns and their differences of SNNU-Bai67 (a) and VNU-18 (b); PXRD patterns of as-synthesized,  $\text{CH}_2\text{Cl}_2$ -exchanged and activated SNNU-Bai67 (c) and VNU-18 (d); slight flexibility of SNNU-Bai67 (e) and VNU-18 (f) after  $\text{CH}_2\text{Cl}_2$ -exchange and activation.

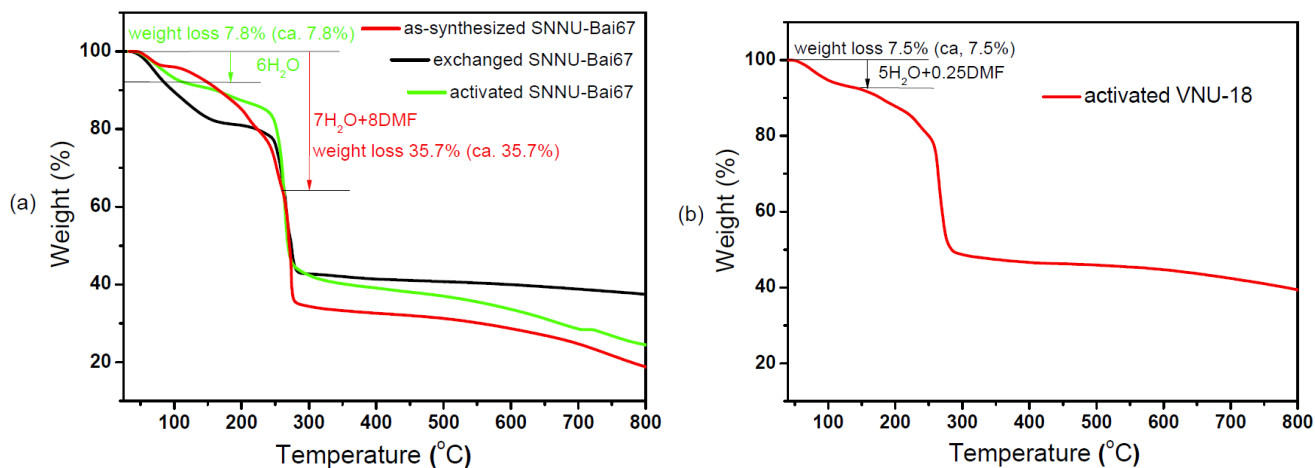

**Figure S8.** TGA curves of as-synthesized (red),  $\text{CH}_2\text{Cl}_2$ -exchanged (blue) and activated (green) SNNU-Bai67 (a) and VNU-18 (b).

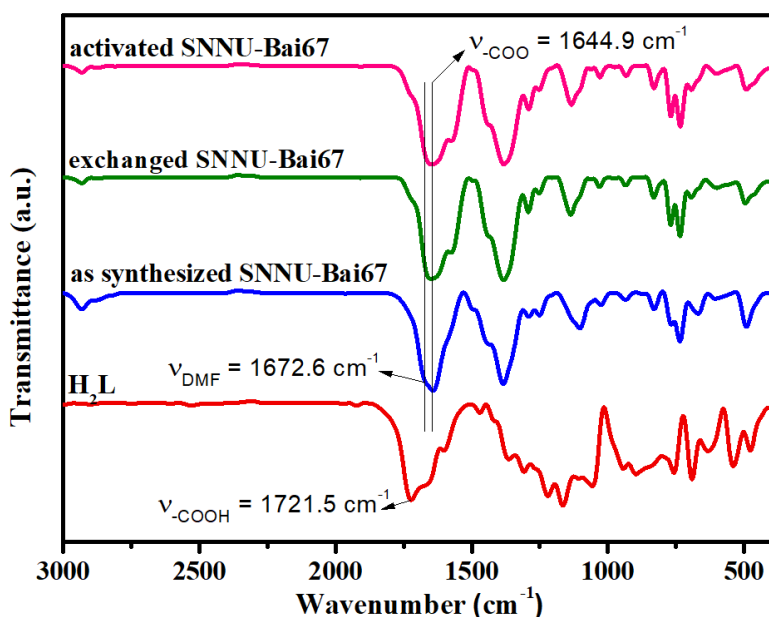

**Figure S9.** Infrared spectra of ligand (red), as-synthesized (blue),  $\text{CH}_2\text{Cl}_2$ -exchanged (green), and activated (pink) SNNU-Bai67. In the spectrum of  $\text{H}_2\text{L}$ , the IR peak of  $-\text{COOH}$  is evident at  $1721.5\text{ cm}^{-1}$  and it shifted to  $1644.9\text{ cm}^{-1}$  after its coordination with  $\text{Cu}^{2+}$  ion in as-synthesized,  $\text{CH}_2\text{Cl}_2$ -exchanged, and activated SNNU-Bai67. Moreover, in the spectrum of as-synthesized SNNU-Bai67, the IR peak of DMF molecule is evident at  $1672.6\text{ cm}^{-1}$  and it disappeared after the  $\text{CH}_2\text{Cl}_2$  exchanged into the pores of exchanged SNNU-Bai67 and in activated SNNU-Bai67, which indicated the successful  $\text{CH}_2\text{Cl}_2$ -exchange in exchanged SNNU-Bai67 and full activation of activated SNNU-Bai67.

**Gas sorption measurements.** Low-pressure adsorption isotherms of N<sub>2</sub> (99.999%), C<sub>2</sub>H<sub>2</sub> (99.999%), C<sub>2</sub>H<sub>4</sub> (99.999%), C<sub>2</sub>H<sub>6</sub> (99.999%) and CH<sub>4</sub> (99.999%) gases were performed on Micromeritics 3Flex surface area and pore size analyzer. Before analysis, about 50 mg samples were activated by using the “outgas” function of the surface area analyzer. For all isotherms, ultra-high purity He gas (UHP grade 5.0, 99.999% purity) was used for the estimation of the free space (warm and cold), assuming that it is not adsorbed at any of the studied temperatures. The specific surface areas were determined using the Brunauer-Emmett-Teller (BET) and the Langmuir equation from the N<sub>2</sub> sorption data at 77 K. When applying the BET theory, we made sure that our analysis satisfied the two consistency criteria as detailed by Walton and co-workers.<sup>[3]</sup> For the Langmuir surface area, data from the whole adsorption data were used.

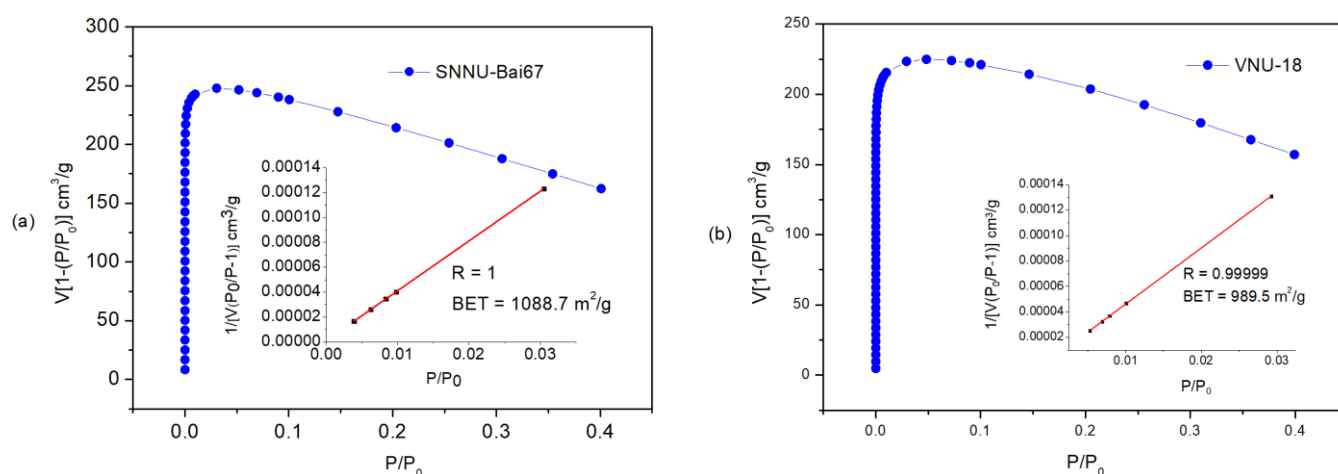

**Figure S10.** The  $V[1-(P/P_0)]$  vs.  $P/P_0$  for SNNU-Bai67 (a) and VNU-18 (b), only the range below  $P/P_0 = 0.04$  or  $0.03$  satisfies the first consistency criterion for applying the BET theory. Inset: Plot of the linear region for the BET equation.

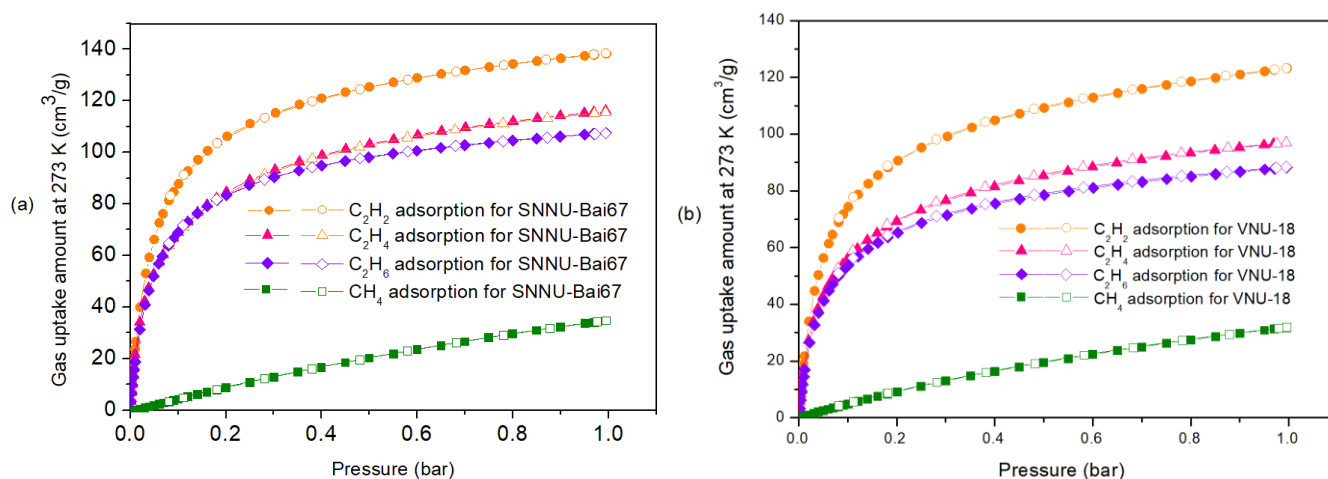

**Figure S11.** C<sub>2</sub>H<sub>2</sub>, C<sub>2</sub>H<sub>4</sub>, C<sub>2</sub>H<sub>6</sub> and CH<sub>4</sub> adsorption isotherms for SNNU-Bai67 (a) and VNU-18 (b) at



273 K with the unit of gas uptake as cm<sup>3</sup>/g (STP); Filled and open symbols represent adsorption and desorption, respectively.

**Estimation of the isosteric heats of gas adsorption.** A virial-type<sup>[4]</sup> expression comprising the temperature-independent parameters  $a_i$  and  $b_j$  was employed to calculate the enthalpies of adsorption for C<sub>2</sub>H<sub>2</sub>, C<sub>2</sub>H<sub>4</sub>, C<sub>2</sub>H<sub>6</sub> and CH<sub>4</sub> (at 273 and 298 K) of activated SNNU-Bai67. In each case, the data were fitted using the equation:

$$\ln P = \ln N + 1/T \sum_{i=0}^m a_i N^i + \sum_{j=0}^n b_j N^j \quad (1)$$

Here,  $P$  is the pressure expressed in Torr,  $N$  is the amount adsorbed in mmol/g,  $T$  is the temperature in K,  $a_i$  and  $b_j$  are virial coefficients, and  $m$ ,  $n$  represent the number of coefficients required to adequately describe the isotherms ( $m$  and  $n$  were gradually increased until the contribution of extra added  $a$  and  $b$  coefficients was deemed to be statistically insignificant towards the overall fit, and the average value of the squared deviations from the experimental values was minimized). The values of the virial coefficients  $a_0$  through  $a_m$  were then used to calculate the isosteric heat of adsorption using the following expression.

$$Q_{st} = -R \sum_{i=0}^m a_i N^i \quad (2)$$

$Q_{st}$  is the coverage-dependent isosteric heat of adsorption and  $R$  is the universal gas constant. The heat of C<sub>2</sub>H<sub>2</sub>, C<sub>2</sub>H<sub>4</sub>, C<sub>2</sub>H<sub>6</sub> and CH<sub>4</sub> sorption for activated SNNU-Bai67 in the manuscript are determined by using the sorption data measured in the pressure range from 0-1 bar (273 and 298 K), which is fitted by the virial-equation very well ( $R^2 > 0.9999$ ).

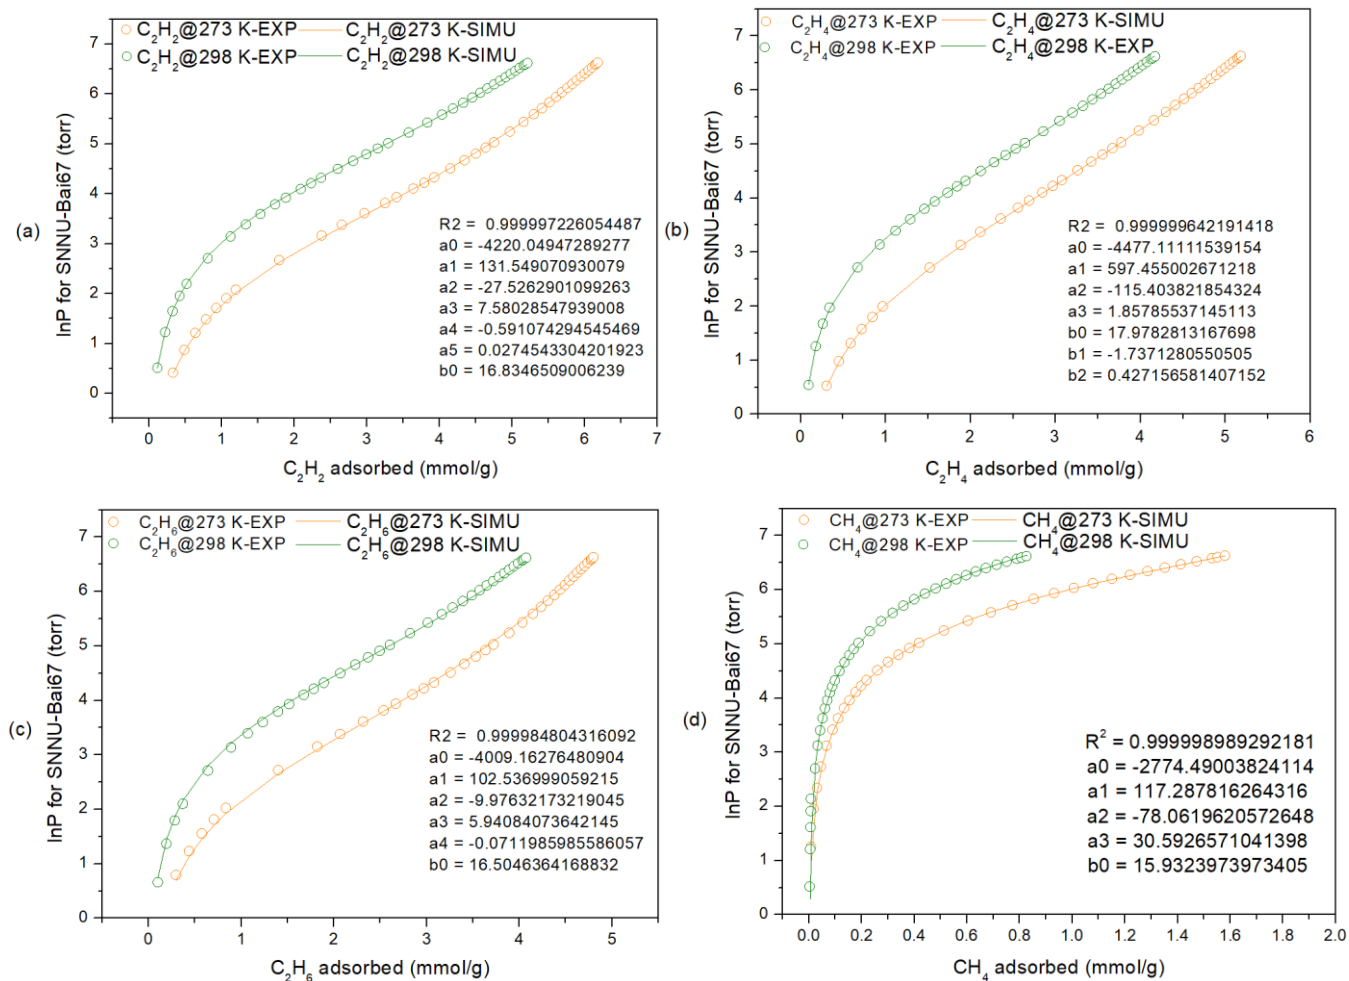

**Figure S12.** The details of virial equation (solid lines) fitting to the experimental  $C_2H_2$  (a),  $C_2H_4$  (b),  $C_2H_6$  (c) and  $CH_4$  (d) adsorption data (symbols) for activated SNNU-Bai67.

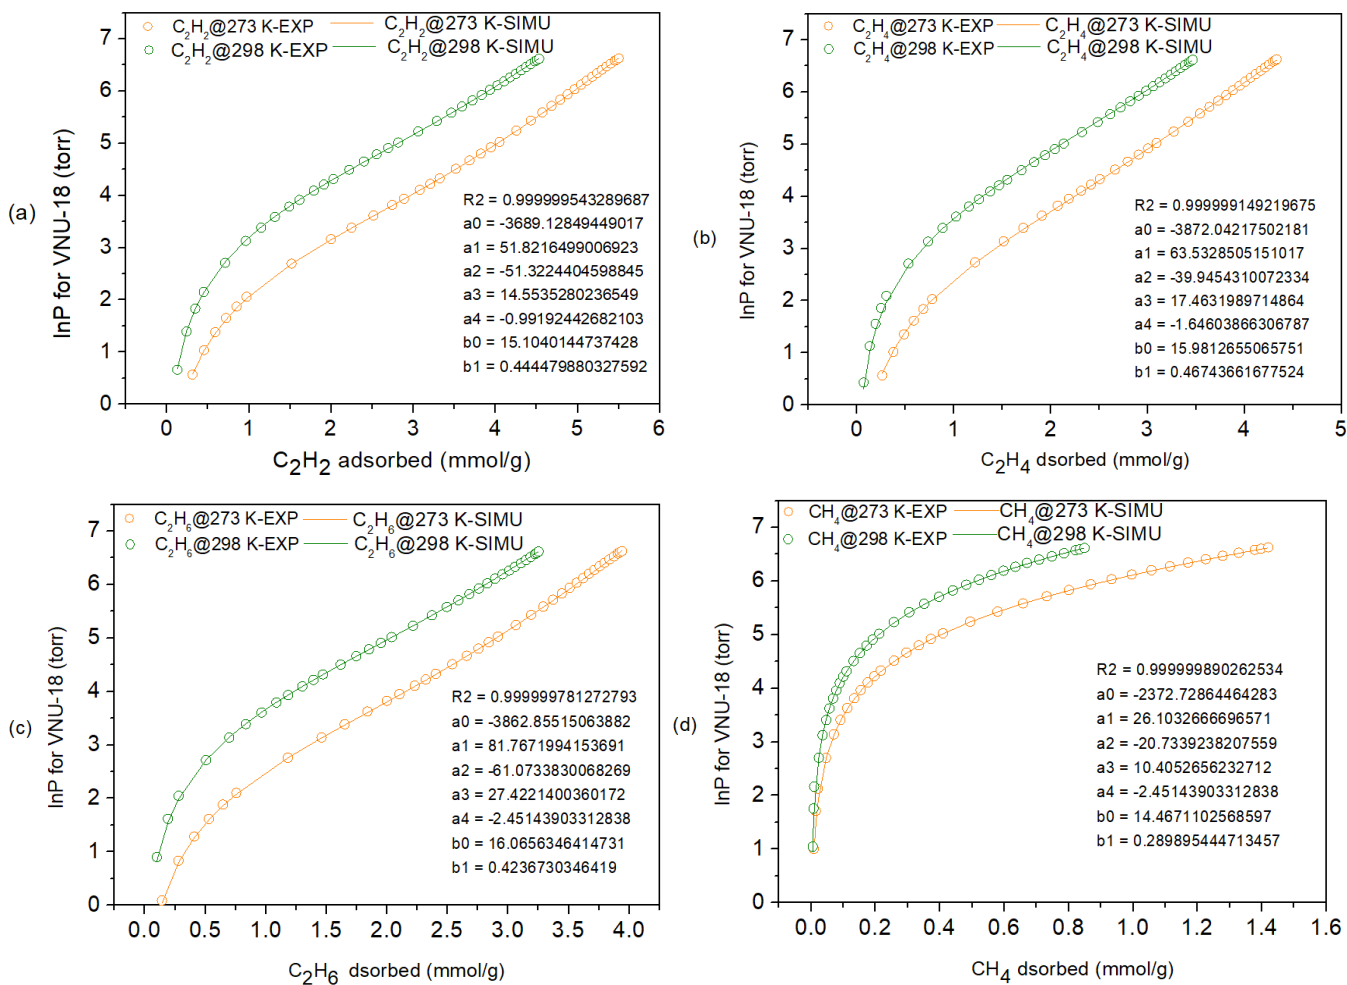

**Figure S13.** The details of virial equation (solid lines) fitting to the experimental  $C_2H_2$  (a),  $C_2H_4$  (b),  $C_2H_6$  (c) and  $CH_4$  (d) adsorption data (symbols) for VNU-18.

**Prediction of the Gas Adsorption Selectivity by IAST.** IAST (ideal adsorption solution theory)<sup>[5-6]</sup> was used to predict binary mixture adsorption from the experimental pure-gas isotherms. In order to perform the integrations required by IAST, the single-component isotherms should be fitted by a proper model. In practice, several methods to do this are available. We found for this set of data that the dual-site Langmuir-Freundlich equation was successful in fitting the data. As can be seen in Figure S14 and Table S2-3, the model fits the isotherms very well ( $R^2 > 0.9999$ ).

$$q = \frac{q_{m,1} b_1 p^{1/n_1}}{1 + b_1 p^{1/n_1}} + \frac{q_{m,2} b_2 p^{1/n_2}}{1 + b_2 p^{1/n_2}} \quad (3)$$

Here,  $P$  is the pressure of the bulk gas at equilibrium with the adsorbed phase (kPa),  $q$  is the adsorbed amount per mass of adsorbent (mmol/g),  $q_{m,1}$  and  $q_{m,2}$  are the saturation capacities of sites 1 and 2 (mmol/g),  $b_1$  and  $b_2$  are the affinity coefficients of sites 1 and 2 (1/kPa), and  $n_1$  and  $n_2$  represent the deviations from an ideal homogeneous surface. The fitted parameters were then used to predict multi-component adsorption with IAST.

The selectivity  $S_{A/B}$  in a binary mixture of components A and B is defined as  $(x_A/y_A)/(x_B/y_B)$ , where  $x_i$  and  $y_i$  are the mole fractions of component  $i$  ( $i = A, B$ ) in the adsorbed and bulk phases, respectively.

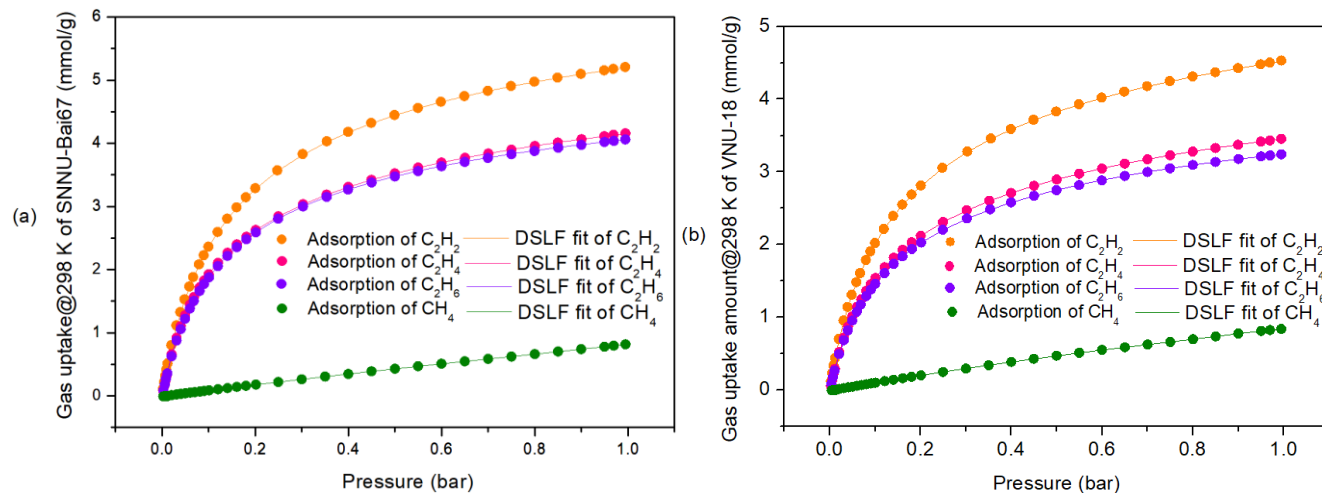

**Figure S14.** Low pressure gas adsorption isotherms and the dual-site Langmuir-Freundlich (DSLFL) fit lines of  $C_2H_2$ ,  $C_2H_4$ ,  $C_2H_6$  and  $CH_4$  in SNNU-Bai67 (a) and VNU-18 (b) at 298 K.

**Table S2.** Dual-site Langmuir-Freundlich parameters for pure C<sub>2</sub>H<sub>2</sub>, C<sub>2</sub>H<sub>4</sub>, C<sub>2</sub>H<sub>6</sub> and CH<sub>4</sub> isotherms in activated SNNU-Bai67 at 298 K

|                  | SNNU-Bai67                    |                               |                               |                      |
|------------------|-------------------------------|-------------------------------|-------------------------------|----------------------|
|                  | C <sub>2</sub> H <sub>2</sub> | C <sub>2</sub> H <sub>4</sub> | C <sub>2</sub> H <sub>6</sub> | CH <sub>4</sub>      |
| R <sup>2</sup>   | 0.999993773432604             | 0.999995326671241             | 0.999994132308008             | 0.999977396320602    |
| q <sub>m,1</sub> | 2.4928740879393               | 2.38092409284434              | 3.06592538141372              | 7.56767855662538     |
| q <sub>m,2</sub> | 4.51534038891507              | 3.36971559425661              | 2.35228182283931              | 0.0175596152872175   |
| b <sub>1</sub>   | 0.0151093385937918            | 0.134412427645968             | 0.110691078400833             | 0.00140410425964977  |
| b <sub>2</sub>   | 0.0995645778573002            | 0.0232484590714453            | 0.018552762173548             | 4.85724902534828E-35 |
| n <sub>1</sub>   | 1.111736252                   | 0.946400212                   | 1.013563138                   | 1.033635678742880    |
| n <sub>2</sub>   | 1.060512841                   | 1.141609791                   | 1.109310821                   | 0.057455926122578    |

**Table S3.** Dual-site Langmuir-Freundlich parameters for pure C<sub>2</sub>H<sub>2</sub>, C<sub>2</sub>H<sub>4</sub>, C<sub>2</sub>H<sub>6</sub> and CH<sub>4</sub> isotherms in VNU-18 at 298 K

|                  | VNU-18                        |                               |                               |                      |
|------------------|-------------------------------|-------------------------------|-------------------------------|----------------------|
|                  | C <sub>2</sub> H <sub>2</sub> | C <sub>2</sub> H <sub>4</sub> | C <sub>2</sub> H <sub>6</sub> | CH <sub>4</sub>      |
| R <sup>2</sup>   | 0.999997566124258             | 0.999995165406282             | 0.999993077253106             | 0.999982088511563    |
| q <sub>m,1</sub> | 2.48311044977533              | 2.12175878108389              | 2.45563781206927              | 0.0165938504076144   |
| q <sub>m,2</sub> | 4.256599107818                | 2.8448595637287               | 2.02866315054155              | 3.24870054992584     |
| b <sub>1</sub>   | 0.00929287161151276           | 0.123538219446429             | 0.110469936023112             | 1.45102717371289E-54 |
| b <sub>2</sub>   | 0.0971281133138944            | 0.0194245812009864            | 0.0161451009227828            | 0.00347104908037213  |
| n <sub>1</sub>   | 1.138639412                   | 0.988141097                   | 1.03472122                    | 0.035892711009700    |
| n <sub>2</sub>   | 1.105931607                   | 1.140459065                   | 1.105922555                   | 1.000375151588010    |

**Computation Detail.** Atomistic GCMC simulations were performed to estimate the adsorption isotherms of C<sub>2</sub>H<sub>2</sub>, C<sub>2</sub>H<sub>4</sub>, C<sub>2</sub>H<sub>6</sub> and CH<sub>4</sub> in SNNU-Bai67 and VNU-18. The framework of SNNU-Bai67 and VNU-18 were fixed from their crystallographic data. All simulations/calculations were performed by the Materials Studio 7.0 package. DFT and PDFT calculations were performed by the Dmol3 module, using the generalized gradient approximation (GGA) with the Perdew-Burke-Ernzerhof (PBE) functional and the double numerical plus d-functions (DNP) basis set, TS for DFT-D correction, and the Effective Core Potentials (ECP).<sup>[7,8]</sup> The Mulliken charges of the atoms of the framework were calculated by PDFT performed through the Dmol3 module. The C<sub>2</sub>H<sub>2</sub>, C<sub>2</sub>H<sub>4</sub>, C<sub>2</sub>H<sub>6</sub> and CH<sub>4</sub> gas molecules were optimized using the DMol3 method and adopted the B3LYP fitted ESP-charge.<sup>[9]</sup> The adsorption isotherms of C<sub>2</sub>H<sub>2</sub>, C<sub>2</sub>H<sub>4</sub>, C<sub>2</sub>H<sub>6</sub> and CH<sub>4</sub> gases at 298 K were estimated through Grand Canonical Monte Carlo (GCMC) simulations by using the adsorption isotherm task and metropolis method in the sorption calculation module.<sup>[6,7]</sup> Both the framework and gas molecule were regarded as rigid. The equilibration steps and production steps were set to  $1 \times 10^6$  and  $1 \times 10^7$ , respectively. The framework and gas molecule were described by the COMPASSII. The cutoff distance was set to 18.5 Å for the Lennard-Jones (LJ) interactions, and the electrostatic interactions and the van der Waals interactions were handled using the Ewald and Atom based summation method, respectively. The adsorption locations of C<sub>2</sub>H<sub>2</sub>, C<sub>2</sub>H<sub>4</sub>, C<sub>2</sub>H<sub>6</sub> and CH<sub>4</sub> molecules were searched through Grand Canonical Monte Carlo (GCMC) simulations by using the location task and metropolis method in the sorption calculation module. The loading steps, production steps and temperature cycles were set to  $1 \times 10^5$ ,  $1 \times 10^7$  and 40, respectively.

The adsorption isotherms for C<sub>2</sub>H<sub>2</sub>, C<sub>2</sub>H<sub>4</sub>, C<sub>2</sub>H<sub>6</sub> and CH<sub>4</sub> gases of SNNU-Bai67 and VNU-18 were simulated at 298 K and below 1 bar. As shown in Fig. S16, the adsorption uptakes for C<sub>2</sub>H<sub>2</sub>, C<sub>2</sub>H<sub>4</sub>, C<sub>2</sub>H<sub>6</sub> and CH<sub>4</sub> of SNNU-Bai67 and VNU-18 were both overestimated, which could be due to the fact that a perfect crystal is utilized in simulation or inaccuracies in the present simulation model. However, for SNNU-Bai67, the trend of adsorption uptakes over the whole pressure range is C<sub>2</sub>H<sub>2</sub>>C<sub>2</sub>H<sub>4</sub>>C<sub>2</sub>H<sub>6</sub>>CH<sub>4</sub>, with those of C<sub>2</sub>H<sub>4</sub> and C<sub>2</sub>H<sub>6</sub> being similar and VNU-18 exhibits the similar trend of those adsorption uptakes, both of which are consistent with those observed in experimentally, respectively. Moreover, the adsorption uptakes for C<sub>2</sub>H<sub>2</sub>, C<sub>2</sub>H<sub>4</sub> and C<sub>2</sub>H<sub>6</sub> of SNNU-Bai67 are slightly higher than those of VNU-18, respectively and that for CH<sub>4</sub> of SNNU-Bai67 is similar to the value of VNU-18, which is also consistent with those observed experimentally, respectively.

The adsorption locations of C<sub>2</sub>H<sub>2</sub>, C<sub>2</sub>H<sub>4</sub>, C<sub>2</sub>H<sub>6</sub> and CH<sub>4</sub> molecules in SNNU-Bai67 and VNU-18 were searched with their adsorption uptakes being equal to those measured in experiments at 1 bar, as shown in Fig. 5. In SNNU-Bai67, the C<sub>2</sub>H<sub>2</sub>, C<sub>2</sub>H<sub>4</sub> and CH<sub>4</sub> molecules with numbers of 13, 10 and 2, respectively, within one unit are all located at the square units in the partial corn-sql layer, whereas 9 of C<sub>2</sub>H<sub>6</sub> molecules

are located at the square units in the partial corn-sql layer and another one  $C_2H_6$  molecule occupies the corner of pillars. In comparison, in VNU-18, the  $C_2H_4$  and  $CH_4$  molecules with numbers of 8 and 2, respectively, within one unit are all located at the square units in the partial corn-sql layer, whereas 9 of  $C_2H_2$  and 7 of  $C_2H_6$  molecules are located at the square units in the partial corn-sql layer and another two  $C_2H_2$  molecules and one  $C_2H_6$  molecule occupies the corner of pillars.

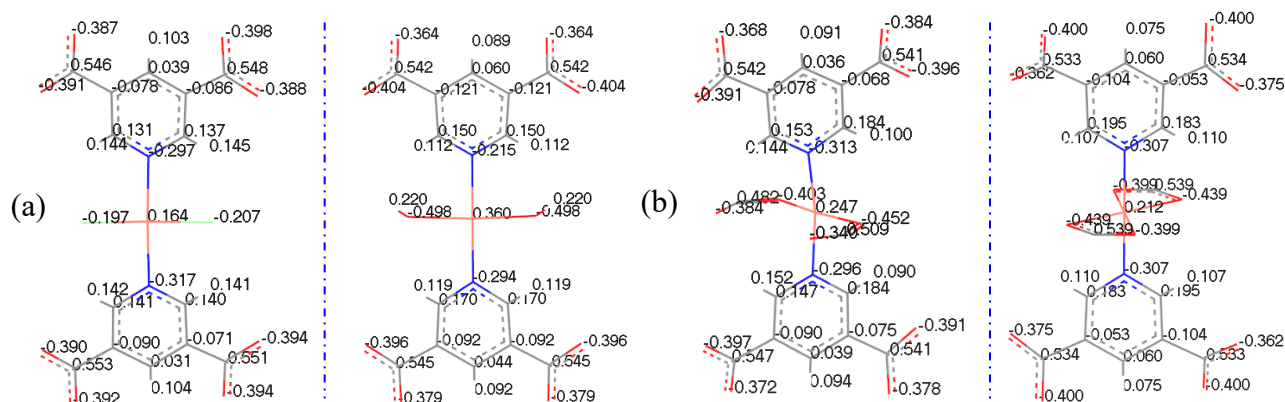

**Figure S15.** The ESP charges used in the GCMC simulations for atoms of ligands constituting the partial corn-sql layers in SNNU-Bai67 and VNU-18.

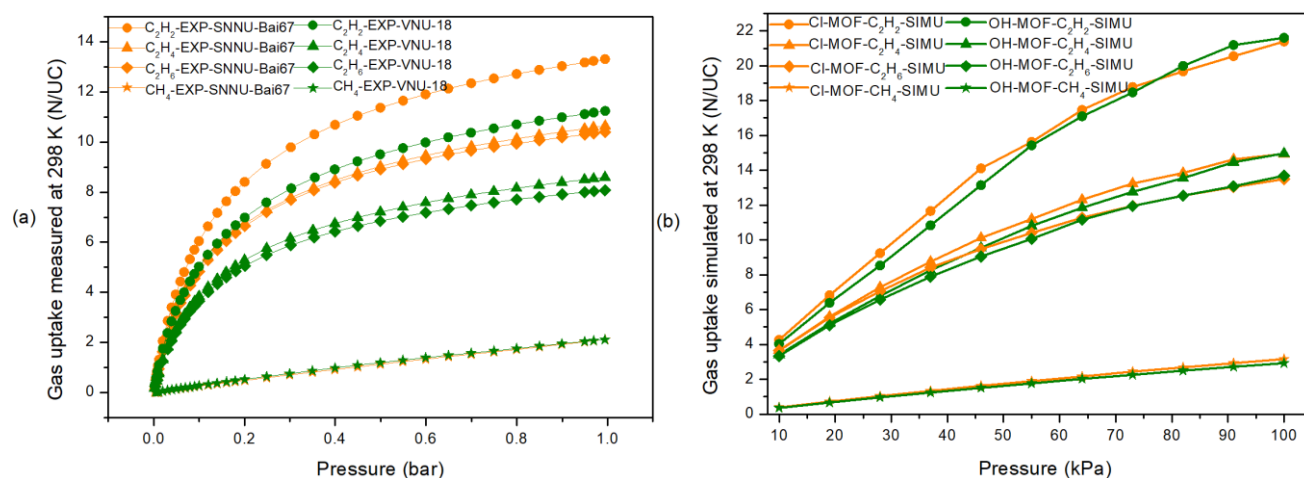

**Figure S16.** The experimental (a) and simulated (b)  $C_2H_2$ ,  $C_2H_4$ ,  $C_2H_6$  and  $CH_4$  adsorption isotherms for SNNU-Bai67 and VNU-18 at 298 K with the unit of gas uptake as N/UC.

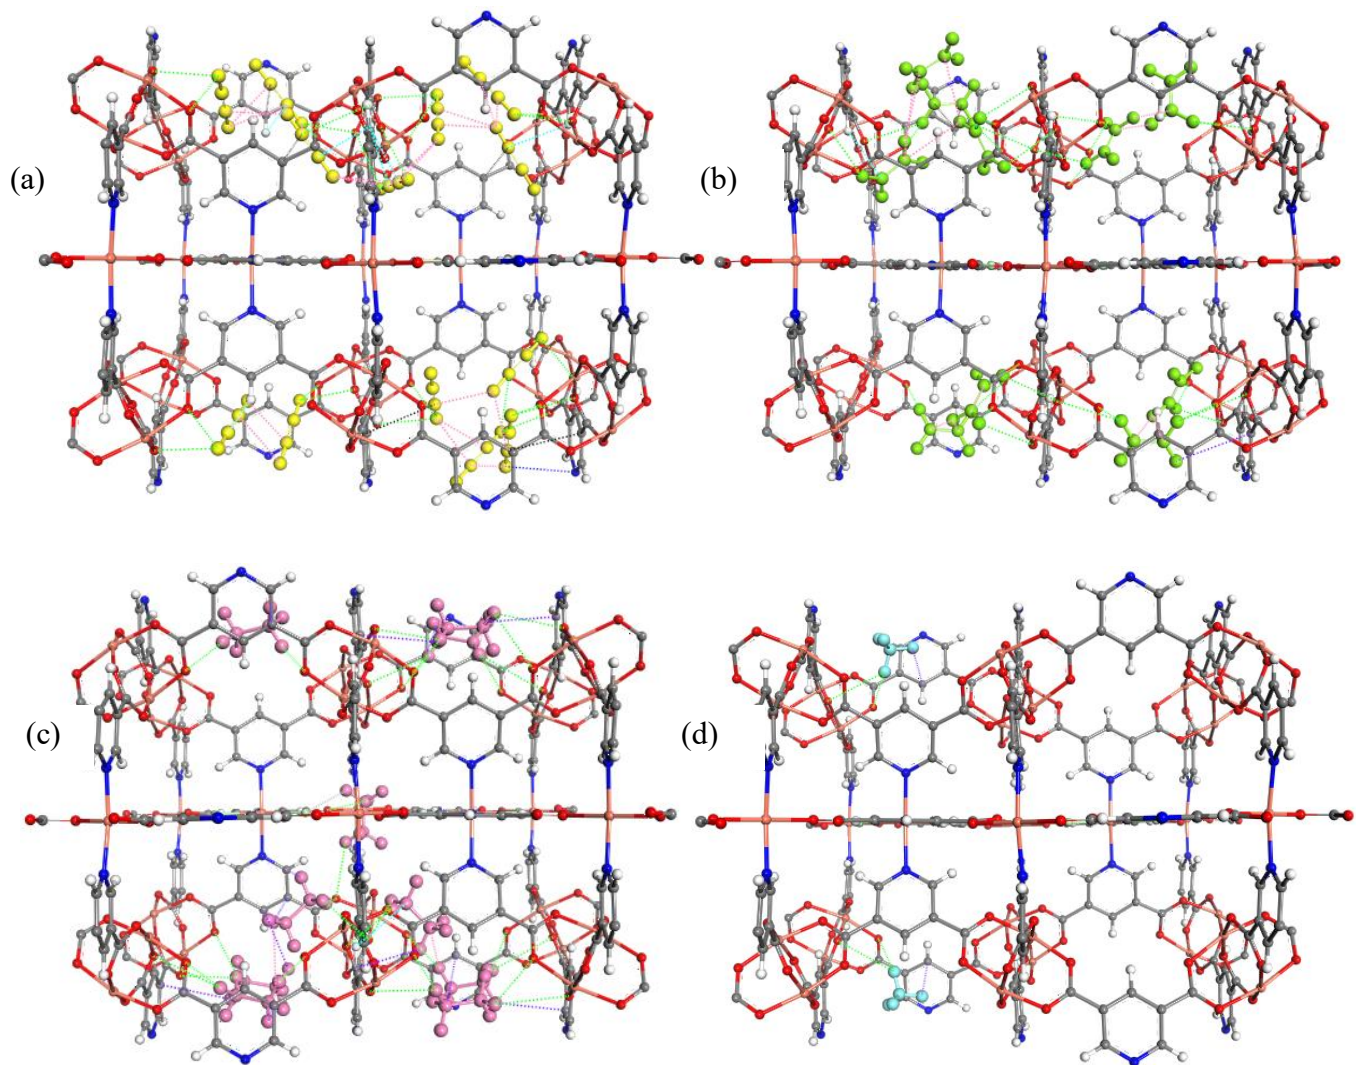

**Figure S17.** The interactions of  $\text{H}_{\text{C}_2\text{H}_2}\dots\text{O}_{\text{COO}}$  (green),  $\text{H}_{\text{C}_2\text{H}_2}\dots\text{N}_{\text{Py}}$  (blue),  $\text{H}_{\text{Py}}\dots\text{C}_{\text{C}_2\text{H}_2}$  (turquoise),  $\pi\dots\pi$  (black) and  $\text{H}_{\text{C}_2\text{H}_2}\dots\text{C}_{\text{C}_2\text{H}_2}$  (pink) in SNNU-Bai67 (a); the interactions of  $\text{H}_{\text{C}_2\text{H}_4}\dots\text{O}_{\text{COO}}$  (green),  $\text{H}_{\text{C}_2\text{H}_4}\dots\text{C}_{\text{Py}}$  (purple),  $\text{H}_{\text{Py}}\dots\text{C}_{\text{C}_2\text{H}_4}$  (turquoise),  $\pi\dots\pi$  (black) and  $\text{H}_{\text{C}_2\text{H}_4}\dots\text{C}_{\text{C}_2\text{H}_4}$  (pink) in SNNU-Bai67 (b); the interactions of  $\text{H}_{\text{C}_2\text{H}_6}\dots\text{O}_{\text{COO}}$  (green),  $\text{H}_{\text{C}_2\text{H}_6}\dots\text{C}_{\text{Py}}$  (purple),  $\text{H}_{\text{Py}}\dots\text{C}_{\text{C}_2\text{H}_6}$  (turquoise),  $\text{H}_{\text{C}_2\text{H}_6}\dots\text{Cl}^-$  (grey) and  $\text{H}_{\text{C}_2\text{H}_6}\dots\text{C}_{\text{C}_2\text{H}_6}$  (pink) in SNNU-Bai67 (c); the interactions of  $\text{H}_{\text{CH}_4}\dots\text{O}_{\text{COO}}$  (green) and  $\text{H}_{\text{CH}_4}\dots\text{C}_{\text{Py}}$  (purple) in SNNU-Bai67 (d).



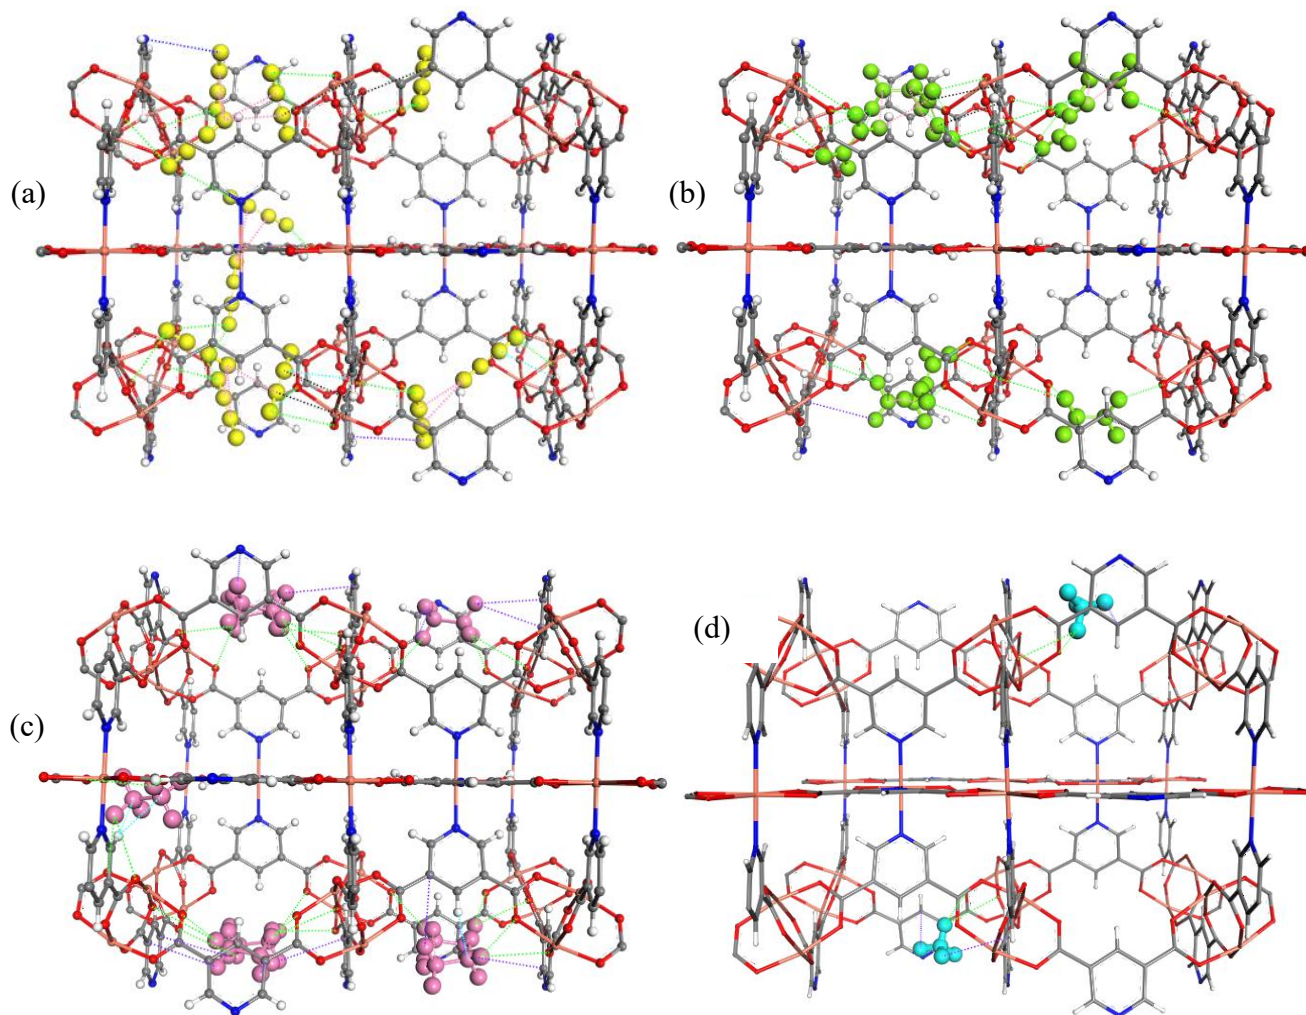

**Figure S18.** The interactions of  $\text{HC}_2\text{H}_2\dots\text{OCOO}$  (green),  $\text{HC}_2\text{H}_2\dots\text{N}_{\text{Py}}$  (blue),  $\text{HC}_2\text{H}_2\dots\text{C}_{\text{Py}}$  (purple),  $\text{H}_{\text{Py}}\dots\text{C}_2\text{H}_2$  (turquoise),  $\pi\dots\pi$  (black) and  $\text{HC}_2\text{H}_2\dots\text{C}_2\text{H}_2$  (pink) in VNU-18 (a); the interactions of  $\text{HC}_2\text{H}_4\dots\text{OCOO}$  (green),  $\text{HC}_2\text{H}_4\dots\text{C}_{\text{Py}}$  (purple),  $\pi\dots\pi$  (black) and  $\text{HC}_2\text{H}_4\dots\text{C}_2\text{H}_4$  (pink) in VNU-18 (b); the interactions of  $\text{HC}_2\text{H}_6\dots\text{OCOO}$  (green),  $\text{HC}_2\text{H}_6\dots\text{C}_{\text{Py}}$  (purple),  $\text{HC}_2\text{H}_6\dots\text{N}_{\text{Py}}$  (blue),  $\text{H}_{\text{Py}}\dots\text{C}_2\text{H}_6$  (turquoise), and  $\text{HC}_2\text{H}_6\dots\text{C}_2\text{H}_6$  (pink) in VNU-18 (c); the interactions of  $\text{H}_{\text{CH}_4}\dots\text{OCOO}$  (green) and  $\text{H}_{\text{CH}_4}\dots\text{C}_{\text{Py}}$  (purple) in VNU-18 (d).

## Reference

- [1] G. M. Sheldrick, *Acta Crystallogr. Sect. A*, 2008, **64**, 112.
- [2] A. L. Spek, *J. Appl. Crystallogr.*, 2003, **36**, 7.
- [3] a) K. S. Walton and K. S. Snurr, *J. Am. Chem. Soc.*, 2007, **129**, 8552; b) J. Rouquerol, P. Llewellyn and F. Rouquerol, *Stud. Surf. Sci. Catal.*, 2007, **160**, 49.
- [4] J. L. C. Rowsell, O. M. Yaghi, *J. Am. Chem. Soc.* 2006, **128**, 1304.
- [5] A. L. Myers, J. M. Prausnitz, *AIChE J.* 1965, **11**, 121.
- [6] a) Y. S. Bae, K. L. Mulfort, H. Frost, P. Ryan, S. Punnathanam, L. J. Broadbelt, J. T. Hupp, R. Q. Snurr, *Langmuir* 2008, **24**, 8592; b) B. Mu, F. Li, K. S. Walton, *Chem. Commun.* 2009, 2493.
- [7] P.-Q. Liao, N.-Y. Huang, W.-X. Zhang, J.-P. Zhang and X.-M. Chen, *Science*, 2017, **356**, 1193.
- [8] Y. Wang, N.-Y. Huang, J.-Q. Shen, P.-Q. Liao, X.-M. Chen and J.-P. Zhang, *J. Am. Chem. Soc.*, 2018, **140**, 38-41.
- [9] H.-G. Hao, Y.-F. Zhao, D.-M. Chen, J.-M. Yu, K. Tan, S. Ma, Y. Chabal, Z.-M. Zhang, J.-M. Dou, Z.-H. Xiao, G. Day, H.-C. Zhou and T.-B. Lu, *Angew. Chem. Int. Ed.*, 2018, **57**, 16067-16071.
